# Supplementary material
Source: PubMed Central journal article supplement (PMC4860952)
Supplement: NIHMS779926-supplement-supp_fig1.pdf [file NIHMS779926-supplement-supp_fig1.pdf]

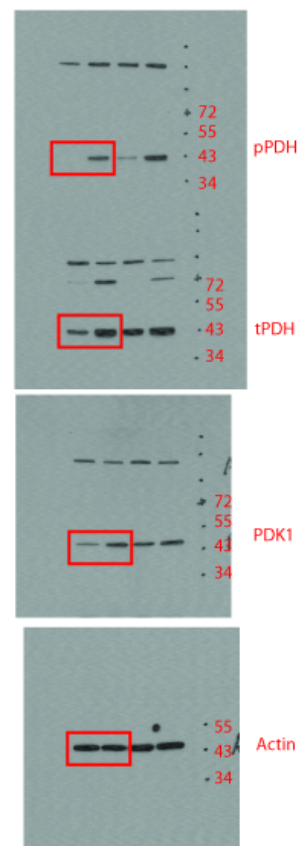

Figure1c

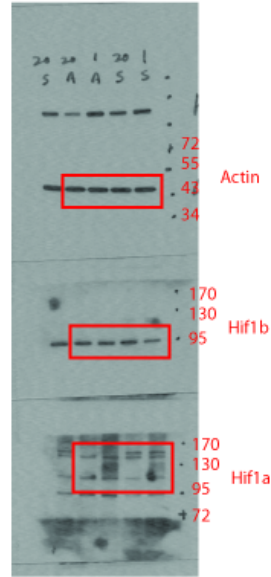

Figure2c

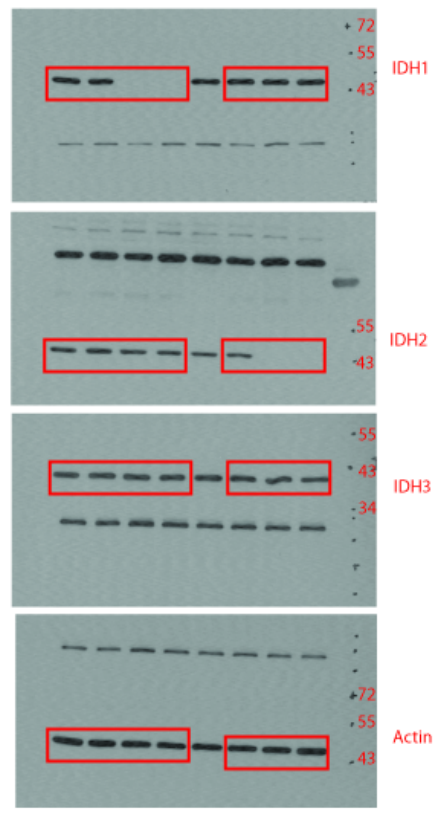

Figure3a(left) and 3b(right)

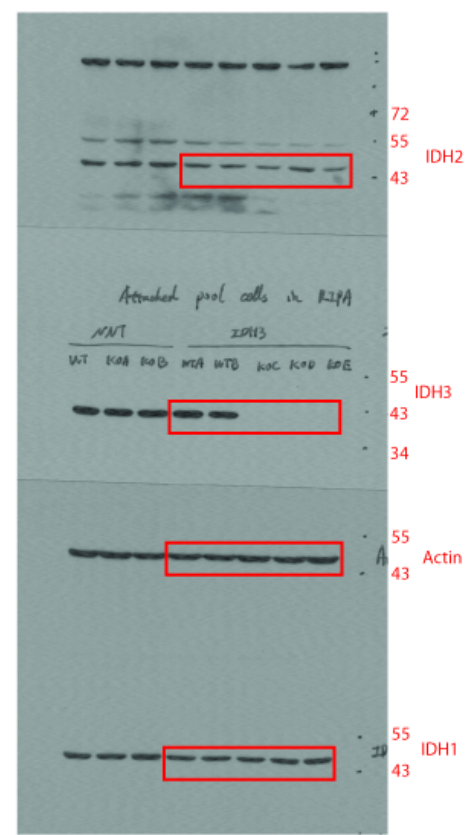

Figure3c

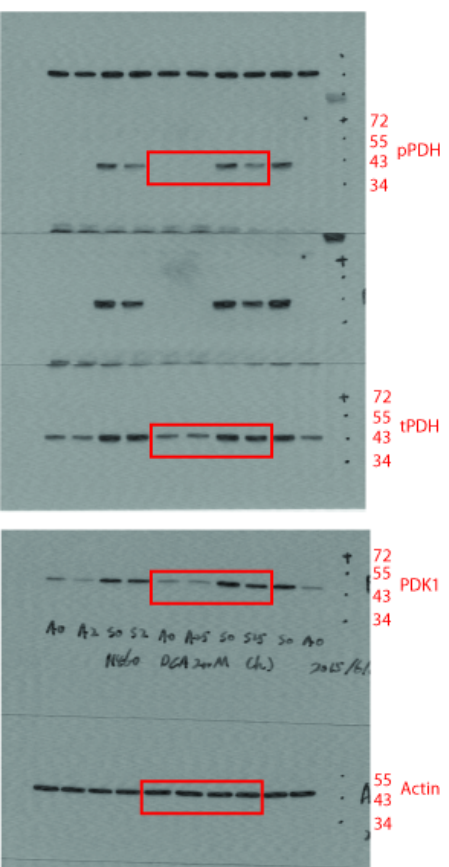

Extended Figure 2f

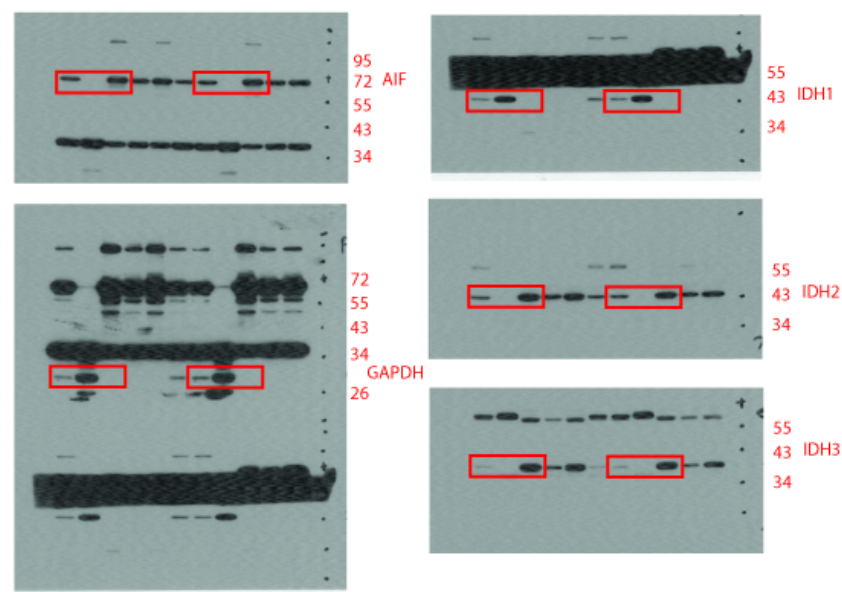

Extended Figure 8a monolayer (left boxes) spheroid (right boxes)

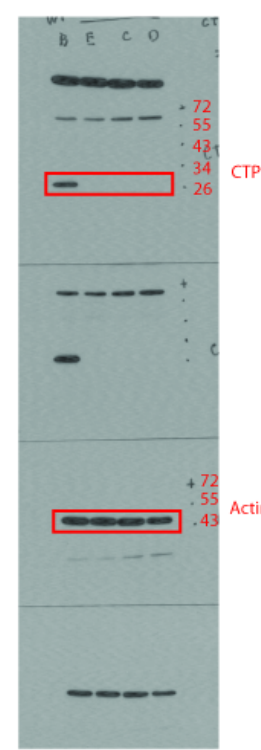

Extended Figure 8c
